# Supplementary material for: Competing bonding and anharmonicity control piezoelectricity and thermal transport in janus BrSbX monolayers
Source: Royal Society of Chemistry journal article supplement (doi:10.1039/d5ra08461j), 2026-01-01
Supplement: d5ra08461j1.pdf [file d5ra08461j1.pdf]

**Supplementary Information: Competing bonding and  
anharmonicity control piezoelectricity and thermal  
transport in Janus BrSbX monolayers**

Viet-Ha Chu,<sup>1</sup> Nguyen Quang Hai,<sup>1</sup> Pham Mai An,<sup>1</sup> Luong  
Minh Tuan,<sup>2</sup> Truong-Tho Pham,<sup>3</sup> and Duc-Long Nguyen<sup>4,5</sup>

*<sup>1</sup>Department of Physics, TNU-University of  
Education, Thai Nguyen, 250000, Vietnam*

*<sup>2</sup>HaNoi University of Civil Engineering, Vietnam*

*<sup>3</sup>Laboratory of Magnetism and Magnetic Materials,  
Science and Technology Advanced Institute,  
Van Lang University, Ho Chi Minh City, Vietnam*

*<sup>4</sup>Simulation in Materials Science Research Group,  
Science and Technology Advanced Institute,  
Van Lang University, Ho Chi Minh City, Vietnam*

*<sup>5</sup>Faculty of Applied Technology, Van Lang School of Technology,  
Van Lang University, Ho Chi Minh City, Vietnam*

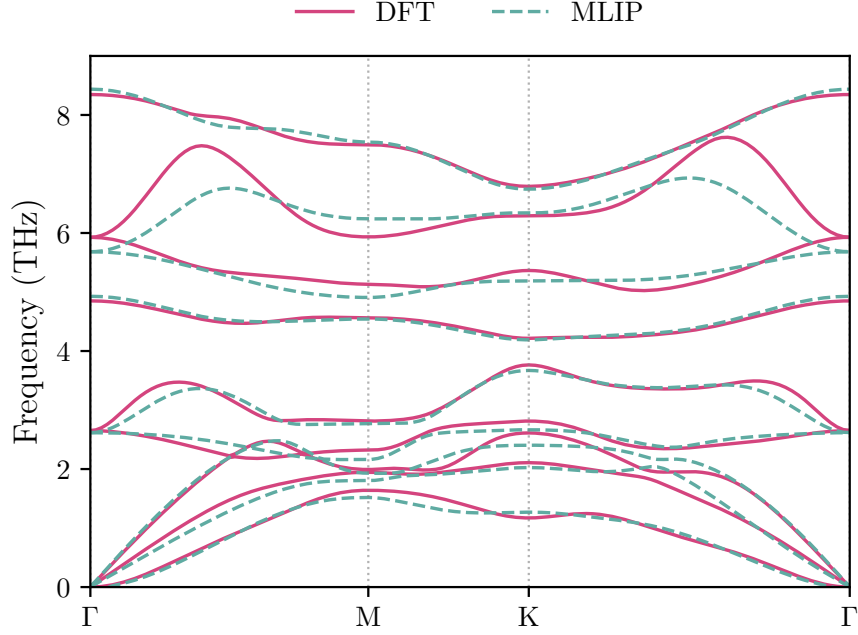

Fig.S 1. Phonon dispersion of BrSbS: DFT vs. MLIP. Phonon spectra along  $\Gamma$ –M–K– $\Gamma$  computed using density-functional theory (DFT) and the trained machine-learning interatomic potential (MLIP). The MLIP reproduces the DFT acoustic and low-frequency optical branches accurately, and the largest deviation occurs in a localized high-frequency optical branch with a maximum difference of only a few  $\text{cm}^{-1}$ . These deviations are consistent with the MLIP validation statistics: energy MAE = 8.58 meV per configuration (0.114 meV/atom), RMS force error = 0.0268 eV  $\text{\AA}^{-1}$  (8.28% of the DFT RMS force), and maximal absolute force difference = 0.163 eV  $\text{\AA}^{-1}$ . The validated MLIP is used to sample third-order force constants for the thermal-transport calculations.

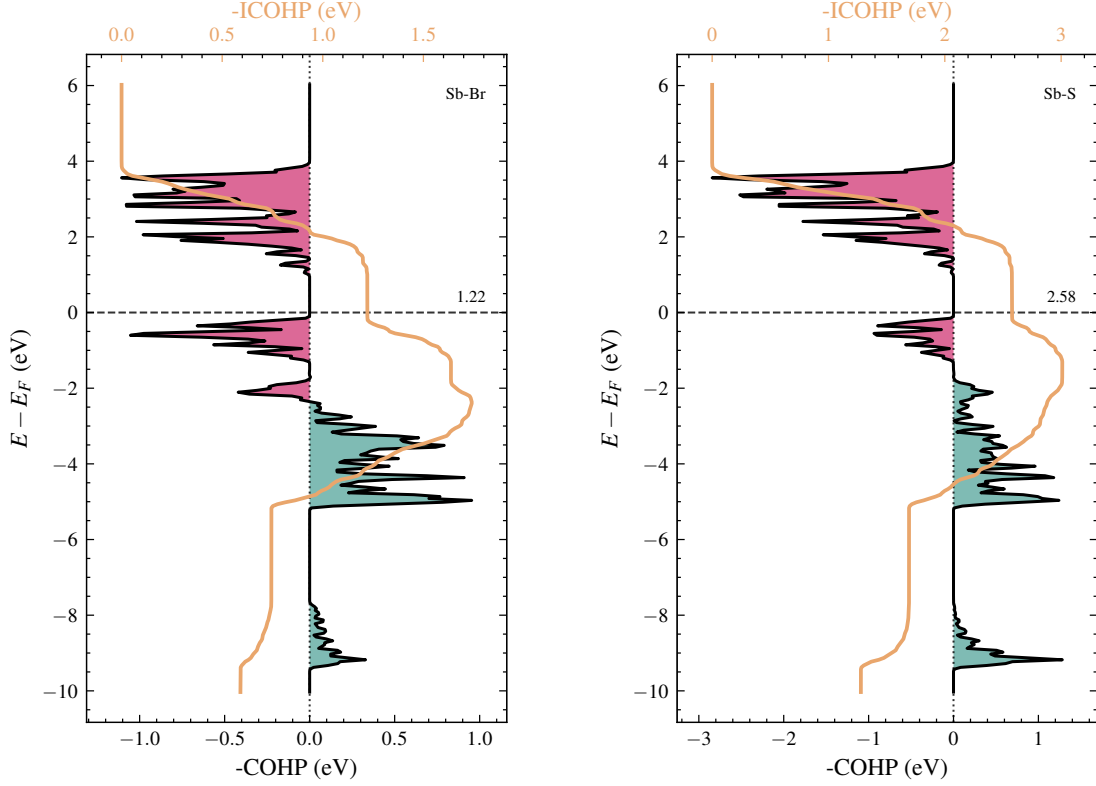

Fig.S 2. COHP and integrated  $-ICOHP$  for Sb-Br (left) and Sb-S (right) in BrSbS. Crystal orbital Hamilton population (COHP) referenced to the Fermi level ( $E - E_F$ ), together with the integrated  $-ICOHP$ . Relative to Sb-S (Fig. S3), the Sb-Br bond shows weaker directional covalency, consistent with the bonding-property link discussed in the main text. Across the BrSbX series ( $X = S, Se, Te$ ), the overall evolution is consistent with a progressive weakening of directional covalency from S to Te that moderates the polarization response under in-plane strain.

## BORN EFFECTIVE CHARGES

To provide microscopic insight into the ionic origin of the piezoelectric response discussed in the main text, we computed the Born effective charge tensors of BrSbX

(X = S, Se, Te) monolayers using density functional perturbation theory. The diagonal in-plane components of the Sb Born effective charge decrease monotonically from BrSbS to BrSbSe and BrSbTe. In parallel, the magnitude of the Br in-plane Born effective charge decreases significantly, while that of the chalcogen X becomes more negative along the S-to-Se-to-Te sequence. These trends indicate a progressive reduction in dynamic charge transfer across the Sb–X bond, fully consistent with the COHP-based weakening of Sb–X covalency discussed in the main text. Importantly, this monotonic reduction of the effective charges directly correlates with the suppression of the in-plane piezoelectric coefficient reported in Table 2 of the main text. The DFPT Born effective charge results provide an independent, microscopic validation that the weakening of Sb–X covalency and internal-strain coupling governs the observed decrease of piezoelectric response from S to Se to Te.

TABLE I. Diagonal in-plane Born effective charges of BrSbX (X = S, Se, Te) monolayers obtained from DFPT. All values are given in units of the elementary charge.

| System | Sb     | Br      | X       |
|--------|--------|---------|---------|
| BrSbS  | 5.8896 | −3.5868 | −2.3028 |
| BrSbSe | 5.7149 | −3.1060 | −2.6089 |
| BrSbTe | 5.3395 | −2.2047 | −3.1348 |
